# Supplementary material for: Geographical variation in malignant and benign/borderline brain and CNS tumor incidence: a comparison between a high-income and a middle-income country
Source: Springer Nature journal article supplement (doi:10.1007/s11060-020-03595-5), 2020-08-19
Supplement: MOESM1 [file 18297344]

## Geographical variation in malignant and benign/borderline brain and CNS tumor incidence: A comparison between a high-income and a middle-income country

Journal of Neuro-Oncology

Miriam Wanner, Sabine Rohrmann, Dimitri Korol, Nino Shenglia, Teimuraz Gigineishvili, David Gigineishvili

Corresponding author:

Miriam Wanner: miriam.wanner@uzh.ch

### Online Resource 1 (Table). Age-adjusted incidence rates of brain and CNS tumors in Georgia and Zurich (Switzerland), March 1, 2009 to February 29, 2012, using different standard populations

|                        | World standard population |          |        |            | WHO standard population |           |        |            | European standard population (1976) |            |        |            |
|------------------------|---------------------------|----------|--------|------------|-------------------------|-----------|--------|------------|-------------------------------------|------------|--------|------------|
|                        | Georgia                   |          | Zurich |            | Georgia                 |           | Zurich |            | Georgia                             |            | Zurich |            |
|                        | AIR                       | 95% CI   | AIR    | 95% CI     | AIR                     | 95% CI    | AIR    | 95% CI     | AIR                                 | 95% CI     | AIR    | 95% CI     |
| Overall                | 9.1                       | 8.6, 9.6 | 18.1   | 16.9, 19.4 | 9.5                     | 9.0, 10.0 | 19.5   | 18.2, 20.7 | 10.9                                | 10.3, 11.5 | 22.7   | 21.3, 24.1 |
| Sex                    |                           |          |        |            |                         |           |        |            |                                     |            |        |            |
| Men                    | 8.0                       | 7.3, 8.7 | 16.7   | 15.1, 18.5 | 8.3                     | 7.6, 9.0  | 17.8   | 16.2, 19.7 | 9.5                                 | 8.8, 10.4  | 20.6   | 18.8, 22.6 |
| Women                  | 9.1                       | 8.4, 9.8 | 19.4   | 17.7, 21.3 | 9.5                     | 8.8, 10.2 | 21.0   | 19.2, 22.9 | 10.9                                | 10.2, 11.7 | 24.6   | 22.6, 26.7 |
| Tumor behavior         |                           |          |        |            |                         |           |        |            |                                     |            |        |            |
| Benign/borderline      | 2.4                       | 2.1, 2.6 | 11.6   | 10.6, 12.6 | 2.5                     | 2.2, 2.8  | 12.6   | 11.6, 13.6 | 2.8                                 | 2.5, 3.1   | 14.7   | 13.7, 15.9 |
| Malignant              | 1.4                       | 1.2, 1.6 | 6.5    | 5.8, 7.3   | 1.5                     | 1.3, 1.7  | 6.9    | 6.1, 7.7   | 1.7                                 | 1.5, 1.9   | 7.9    | 7.1, 8.8   |
| unspecified            | 5.3                       | 4.9, 5.7 | -      |            | 5.5                     | 5.1, 5.9  | -      |            | 6.4                                 | 5.9, 6.8   | -      |            |
| Tumor behavior and sex |                           |          |        |            |                         |           |        |            |                                     |            |        |            |
| Men benign/borderline  | 1.7                       | 1.4, 2.1 | 8.8    | 7.6, 10.2  | 1.8                     | 1.5, 2.2  | 9.4    | 8.2, 10.8  | 2.0                                 | 1.7, 2.4   | 10.7   | 9.4, 12.2  |
| Men malignant          | 1.6                       | 1.3, 1.9 | 7.9    | 6.8, 9.1   | 1.7                     | 1.4, 2.0  | 8.4    | 7.3, 9.7   | 1.9                                 | 1.6, 2.3   | 9.9    | 8.6, 11.3  |
| Men unspecified        | 4.6                       | 4.1, 5.2 | -      |            | 4.8                     | 4.3, 5.4  | -      |            | 5.6                                 | 5.0, 6.2   | -      |            |
| Women benign/borderl.  | 2.7                       | 2.4, 3.1 | 14.1   | 12.7, 15.6 | 2.9                     | 2.5, 3.3  | 15.5   | 14.0, 17.1 | 3.3                                 | 2.9, 3.8   | 18.4   | 16.7, 20.2 |
| Women malignant        | 1.2                       | 1.0, 1.5 | 5.3    | 4.3, 6.4   | 1.3                     | 1.1, 1.6  | 5.5    | 4.5, 6.6   | 1.5                                 | 1.2, 1.8   | 6.2    | 5.2, 7.3   |
| Women unspecified      | 5.1                       | 4.6, 5.6 | -      |            | 5.3                     | 4.8, 5.9  | -      |            | 6.1                                 | 5.5, 6.7   | -      |            |

Abbreviations: AIR, age-adjusted incidence rate per 100,000 person-years (adjusted to different standard populations); 95% CI, 95% confidence intervals (based on the gamma distribution proposed by Tiwari et al. 2006 [17])
