# Supplementary material for: Geographical variation in malignant and benign/borderline brain and CNS tumor incidence: a comparison between a high-income and a middle-income country
Source: Springer Nature journal article supplement (doi:10.1007/s11060-020-03595-5), 2020-08-19

**Geographical variation in malignant and benign/borderline brain and CNS tumor incidence: A comparison between a high-income and a middle-income country**

Journal of Neuro-Oncology

Miriam Wanner, Sabine Rohrmann, Dimitri Korol, Nino Shenglia, Teimuraz Gigineishvili, David Gigineishvili

Corresponding author:

Miriam Wanner: [miriam.wanner@uzh.ch](mailto:miriam.wanner@uzh.ch)

**Online Resource 2 (Figure). Age-standardized incidence rates for selected histology subtypes by age group for Georgia and Zurich (Switzerland), March 1, 2009 to February 29, 2012**

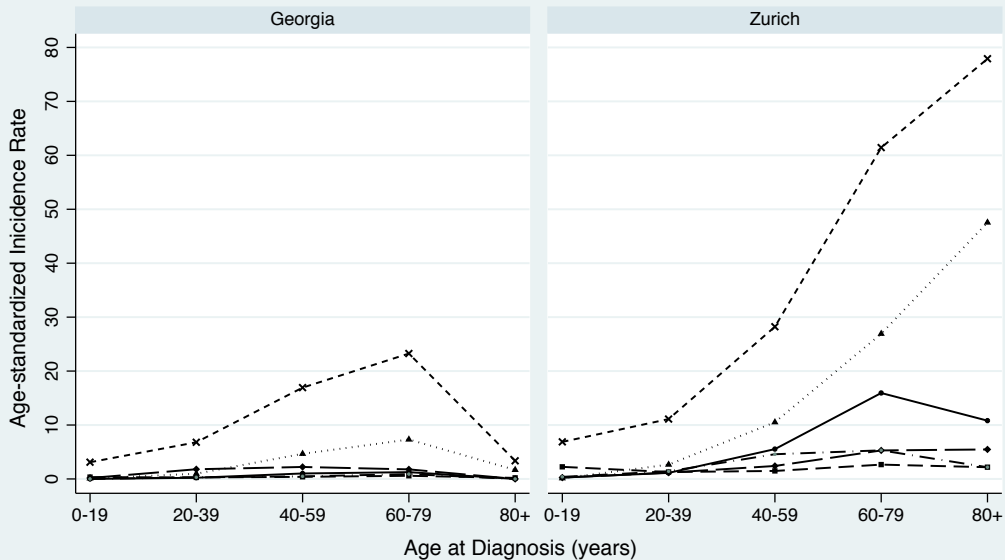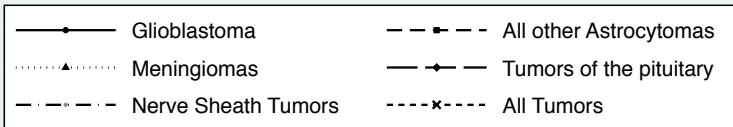

Supplement: MOESM2 [file 18297344]
